# Supplementary material for: Heavy Metal Effects on Biodiversity and Stress Responses of Plants Inhabiting Contaminated Soil in Khulais, Saudi Arabia
Source: MDPI journal article supplement (doi:10.3390/biology11020164), 2022-01-20
Supplement: s1 [file s1]

### Table S1

List of the recorded species in the different sites with their, families, relative densities (RD) and frequencies (F) in the different sites.

[illegible]

|                |                                         |     |    |     |    |     |    |     |    |     |    |
|----------------|-----------------------------------------|-----|----|-----|----|-----|----|-----|----|-----|----|
| Portulacaceae  | <i>Portulaca oleraceae</i> L.           | 6.2 | 45 | 5.9 | 43 | 0   | 0  | 1   | 4  | 0   | 0  |
| Resedaceae     | <i>Ochradenus baccatus</i> Del.         | 0   | 0  | 0   | 0  | 0   | 0  | 0   | 0  | 3.1 | 13 |
| Solanaceae     | <i>Solanum incanum</i> L.               | 0   | 0  | 0   | 0  | 0   | 0  | 0   | 0  | 3.4 | 16 |
| Tamaricaceae   | <i>Tamarix nilotica</i> (Ehrenb.) Bunge | 2.3 | 20 | 2.1 | 21 | 2.1 | 13 | 1   | 3  | 1.1 | 12 |
| Zygophyllaceae | <i>Fagonia mollis</i> Delile.           | 0   | 0  | 0   | 0  | 0   | 0  | 0   | 0  | 2.7 | 5  |
|                | <i>Tribulus macropterus</i> Boiss.      | 0   | 0  | 1.1 | 8  | 0   | 0  | 1.1 | 17 | 1.3 | 14 |
